# Supplementary material for: Add-on Cannabidiol Treatment for Drug-Resistant Seizures in Tuberous Sclerosis Complex: A Placebo-Controlled Randomized Clinical Trial
Source: PubMed Central journal article supplement — JAMA Neurol. 2020 Dec 21;78(3):1–9. doi: 10.1001/jamaneurol.2020.4607 (PMC7754080; doi:10.1001/jamaneurol.2020.4607), 2020-12-21
Supplement: jamaneurol-e204607-s003.pdf [file jamaneurol-e204607-s003.pdf]

Supplementary Online Material: Nonauthor Collaborators

**Group Name:\* GWPCARE6 Study Group**

| First Name, Middle Initial* | Last Name* | Suffix* | Academic Degrees | Institution | Location (city, state/province, country) | Role or Contribution, eg, chair, principal investigator | Subgroup, eg, Steering Committee |
|-----------------------------|------------|---------|------------------|-------------|------------------------------------------|---------------------------------------------------------|----------------------------------|
|-----------------------------|------------|---------|------------------|-------------|------------------------------------------|---------------------------------------------------------|----------------------------------|

|                 |                    |  |  |  |  |  |  |
|-----------------|--------------------|--|--|--|--|--|--|
| John            | Archer             |  |  |  |  |  |  |
| Daniel H.       | Arndt              |  |  |  |  |  |  |
| Todd            | Barron             |  |  |  |  |  |  |
| E. Martina      | Bebin              |  |  |  |  |  |  |
| Hari            | Bhathal            |  |  |  |  |  |  |
| Verónica        | Cantarín-Extremera |  |  |  |  |  |  |
| Rocio           | Sanchez-Carpintero |  |  |  |  |  |  |
| Michael A.      | Ciliberto          |  |  |  |  |  |  |
| Hannah          | Cock               |  |  |  |  |  |  |
| Marie-Claire Y. | De Wit             |  |  |  |  |  |  |
| Orrin           | Devinsky           |  |  |  |  |  |  |
| Merce           | Falip              |  |  |  |  |  |  |
| Francis M.      | Filloux            |  |  |  |  |  |  |
| Nathan B.       | Fountain           |  |  |  |  |  |  |
| Jacek           | Gawlowicz          |  |  |  |  |  |  |
| Robert S.       | Greenwood          |  |  |  |  |  |  |
| Khalid          | Hamandi            |  |  |  |  |  |  |
| Floor E.        | Jansen             |  |  |  |  |  |  |
| Charuta         | Joshi              |  |  |  |  |  |  |
| Sergiusz        | Józwiak            |  |  |  |  |  |  |
| Pavel           | Klein              |  |  |  |  |  |  |
| Katarzyna       | Kotulska           |  |  |  |  |  |  |
| Patrick         | Kwan               |  |  |  |  |  |  |
| John A.         | Lawson             |  |  |  |  |  |  |
| Pawel           | Lisewski           |  |  |  |  |  |  |
| Ian O.          | Miller             |  |  |  |  |  |  |
| Richard P.      | Morse              |  |  |  |  |  |  |
| Ali S.          | Mostajelean        |  |  |  |  |  |  |
| Danielle A.     | Nolan              |  |  |  |  |  |  |
| Terence J.      | O'Brien            |  |  |  |  |  |  |
| Finbar J.       | O'Callaghan        |  |  |  |  |  |  |

Supplementary Online Material: Nonauthor Collaborators

| First Name, Middle Initial* | Last Name* | Suffix* | Academic Degrees | Institution | Location (city, state/province, country) | Role or Contribution, eg, chair, principal investigator | Subgroup, eg, Steering Committee |
|-----------------------------|------------|---------|------------------|-------------|------------------------------------------|---------------------------------------------------------|----------------------------------|
|-----------------------------|------------|---------|------------------|-------------|------------------------------------------|---------------------------------------------------------|----------------------------------|

|              |           |  |  |  |  |  |  |
|--------------|-----------|--|--|--|--|--|--|
| Fernando     | Paredes   |  |  |  |  |  |  |
| M. Scott     | Perry     |  |  |  |  |  |  |
| Federico J.  | Ramos     |  |  |  |  |  |  |
| David        | Reutens   |  |  |  |  |  |  |
| Colin M.     | Roberts   |  |  |  |  |  |  |
| Russell P.   | Saneto    |  |  |  |  |  |  |
| Gregory B.   | Sharp     |  |  |  |  |  |  |
| Anurag       | Saxena    |  |  |  |  |  |  |
| Steven P.    | Sparagana |  |  |  |  |  |  |
| Priyamvada   | Tatachar  |  |  |  |  |  |  |
| Elizabeth A. | Thiele    |  |  |  |  |  |  |
| James W.     | Wheless   |  |  |  |  |  |  |
| Elaine C.    | Wirrell   |  |  |  |  |  |  |
| Matthew H.   | Wong      |  |  |  |  |  |  |
| Michael      | Wong      |  |  |  |  |  |  |
| Joyce Y.     | Wu        |  |  |  |  |  |  |
| Marta        | Żółnowska |  |  |  |  |  |  |
